# Supplementary material for: Depolymerization of Fucosylated Chondroitin Sulfate with a Modified Fenton-System and Anticoagulant Activity of the Resulting Fragments
Source: MDPI journal article supplement (doi:10.3390/md14090170), 2016-09-21
Supplement: s1 [file s1]

# Supplementary Materials: Depolymerization of Fucosylated Chondroitin Sulfate with a Modified Fenton-System and Anticoagulant Activity of the Resulting Fragments

Jun-hui Li, Shan Li, Zi-jian Zhi, Lu-feng Yan, Xing-qian Ye, Tian Ding, Lei Yan, Robert John Linhardt and Shi-guo Chen

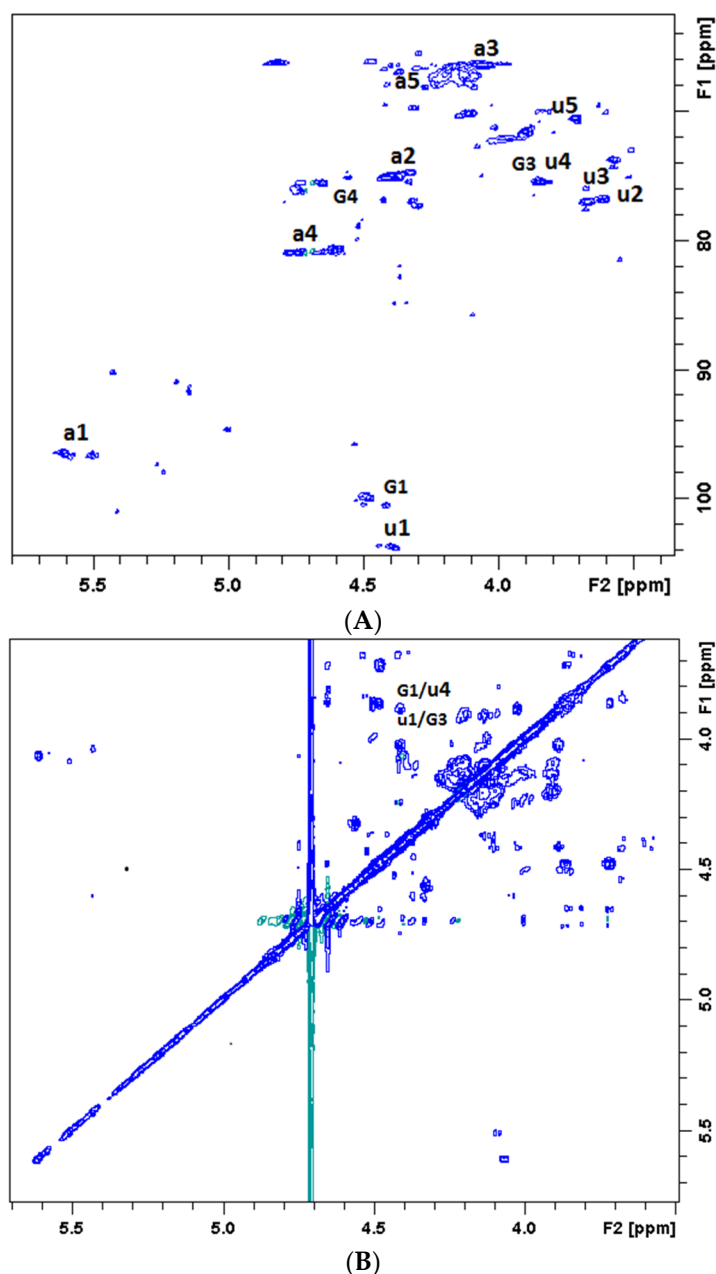

**Figure S1.** The 2D NMR spectra of DfCS-5 prepared by Fenton-system (pH 6.0) at the concentration of 0.2 mol/L  $\text{H}_2\text{O}_2$  and 0.2 mmol/L  $\text{Cu}^{2+}$  and at 55 °C: (A) Heteronuclear single quantum coherence (HSQC); (B) nuclear overhauser effect spectroscopy (NEOSY). Signals designated with a refer to those produced by Fuc2,4S; signals designated with G and u refer to *N*-acetyl-D-galactosamine (GalNAc) and glucuronic acid (GlcA), respectively.

**Table S1.** Assignment of  $^1\text{H}/^{13}\text{C}$  NMR signals of depolymerized products.

| Samples    | D-fCS-1b-5h      |                        |                       | Fuc0S **<br>(Standard) | CSE ***          |                        |
|------------|------------------|------------------------|-----------------------|------------------------|------------------|------------------------|
|            | GlcA ( $\beta$ ) | GalNAc4,6S ( $\beta$ ) | Fuc2,4S( $\alpha$ )   |                        | GlcA ( $\beta$ ) | GalNAc4,6S ( $\beta$ ) |
| H1<br>(C1) | 4.39<br>(103.2)  | 4.4<br>(100.2)         | 5.60 or 5.5<br>(96.1) | 5.03<br>-              | 4.49<br>(104.2)  | 4.65<br>(102.1)        |
| H2<br>(C2) | 3.51<br>(72.9)   | 3.85<br>(52.3)         | 4.39<br>(75.7)        | 3.96<br>-              | 3.41<br>(73.0)   | 4.07<br>(52.2)         |
| H3<br>(C3) | 3.67<br>(76.9)   | 3.87<br>(75.3)         | 4.09<br>(66.1)        | 4.01<br>-              | 3.60<br>(74.7)   | 4.07<br>(76.1)         |
| H4<br>(C4) | 3.80<br>(71.6)   | 4.59<br>(76.3)         | 4.73<br>(80.6)        | 3.96<br>-              | 3.80<br>(82.6)   | 4.80<br>(76.6)         |
| H5<br>(C5) | -                | -                      | 4.42<br>(67.7)        | 4.35<br>-              | 3.68<br>(77.5)   | 4.10<br>(73.3)         |
| H6<br>(C6) | -                | -                      | -                     | 1.21<br>-              | -                | 4.30<br>(68.5)         |
| CH3        | -                | 1.92<br>(24.0)         | -                     | -                      | -                | -                      |
| C=O        | -<br>(175.2)     | -<br>(176.3)           | -                     | -                      | -                | -                      |

\*\* The chemical shifts of Fuc0S were from a standard non-sulfated monosaccharide fucose, cited from reference [1]; \*\*\* Chemical shifts of chondroitin sulfate type E (CSE) are cited from reference [1]; GlcA: Glucuronic acid; GalNAc: N-acetyl-D-galactosamine; Fuc: fucose.

## References

1. Chen, S.G.; Li, G.Y.; Wu, N.; Guo, X.; Liao, N.B.; Ye, X.Q.; Liu, D.H.; Xue, C.H.; Chai, W.G. Sulfation pattern of the fucose branch is important for the anticoagulant and antithrombotic activities of fucosylated chondroitin sulfates. *Biochim. Biophys. Acta* **2013**, *1830*, 3054–3066.
